# Supplementary material for: Increasing potency and price of cannabis in Europe, 2006–16
Source: PubMed Central journal article supplement — Addiction. 2019 Jan 16;114(6):1015–23. doi: 10.1111/add.14525 (PMC6590252; doi:10.1111/add.14525), 2019-01-16
Supplement: ADD-114-1015-s001.pdf [file ADD-114-1015-s001.pdf]

## Online Supporting Information:

### Increasing potency and price of cannabis in Europe, 2006-2016

#### Supplementary tables S1-S2

Table S1: Country-specific information on coverage and sampling of cannabis potency data

| Country        | Coverage          | Sampling                                                                     |
|----------------|-------------------|------------------------------------------------------------------------------|
| Austria        | National          | Routine analysis of seizures and test purchases at street level              |
| Belgium        | National          | Seizures and collected samples following prosecutors' decision, amnesty bins |
| Bulgaria       | District of Sofia | All seizures                                                                 |
| Croatia        | National          | All seizures                                                                 |
| Czech Republic | National          | All seizures                                                                 |
| Estonia        | National          | All seizures                                                                 |
| Finland        | National          | All seizures for which test is requested and weight >150g                    |
| France         | National          | All seizures                                                                 |
| Hungary        | National          | All seizures submitted for analysis of herbal cannabis >8g/resin >25g        |
| Italy          | National          | Seizures under threshold/all seizures in Latium region                       |
| Malta          | National          | Random sample of police and customs seizures                                 |
| Netherlands    | National          | Random sample of test purchases in coffee shops                              |
| Norway         | National          | All seizures                                                                 |
| Poland         | National          | Seizures and material from cultivation                                       |
| Portugal       | National          | Random sample of seizures <1g                                                |
| Romania        | National          | Sampling when requested by authorities (< 1kg)                               |
| Slovakia       | National          | All seizures                                                                 |
| Slovenia       | National          | Random sample of all seizures                                                |
| Sweden         | National          | Police seizures                                                              |
| Turkey         | National          | Seizures analysed for judicial or law enforcement needs                      |
| UK             | England and Wales | Sampled from street level users issued a warning                             |

Table S2: Country-specific information on coverage and sampling of cannabis price data

| Country        | Coverage          | Sampling                                                                              |
|----------------|-------------------|---------------------------------------------------------------------------------------|
| Belgium (a)    | National          | Annual police survey informed by drug users and dealers                               |
| Belgium (b)    | Local (4 cities)  | Annual survey of drug users recruited from the community                              |
| Bulgaria (a)   | National          | Annual police survey                                                                  |
| Bulgaria (b)   | Local (16 cities) | Two annual surveys from police and field workers                                      |
| Croatia        | National          | Survey from police informants                                                         |
| Czech Republic | National          | Two annual surveys from police                                                        |
| Denmark        | National          | Two annual surveys from police informed by drug users and dealers                     |
| Estonia        | National          | Annual police survey informed by informants and arrestees                             |
| Germany        | National          | Police survey based on interrogation and routine work                                 |
| Greece         | National          | Police survey informed by drug users and police purchase                              |
| Hungary        | National          | Annual survey from drug users at outpatient treatment centres                         |
| Italy          | National          | Police survey                                                                         |
| Lithuania      | National          | Police survey                                                                         |
| Luxembourg     | National          | Annual survey from drug users in harm reduction services                              |
| Malta          | National          | Quarterly survey from police drug squad informed by arrestees                         |
| Netherlands    | National          | Random sample of test purchases in coffee shops                                       |
| Norway         | Oslo              | Self-reported data from drug users                                                    |
| Poland (a)     | National          | Police survey                                                                         |
| Poland (b)     | National          | Drug users surveyed about most recent purchase                                        |
| Spain          | National          | Police survey informed by arrestees and operational intelligence twice a year         |
| Slovakia       | National          | Survey of users, arrestees and test purchases                                         |
| Slovenia       | National          | Annual survey of police and operational intelligence                                  |
| Sweden         | National          | Two annual surveys from police                                                        |
| UK             | National          | Annual police survey informed by interviews, intelligence, test purchases and records |

Supplementary figures S1-S6

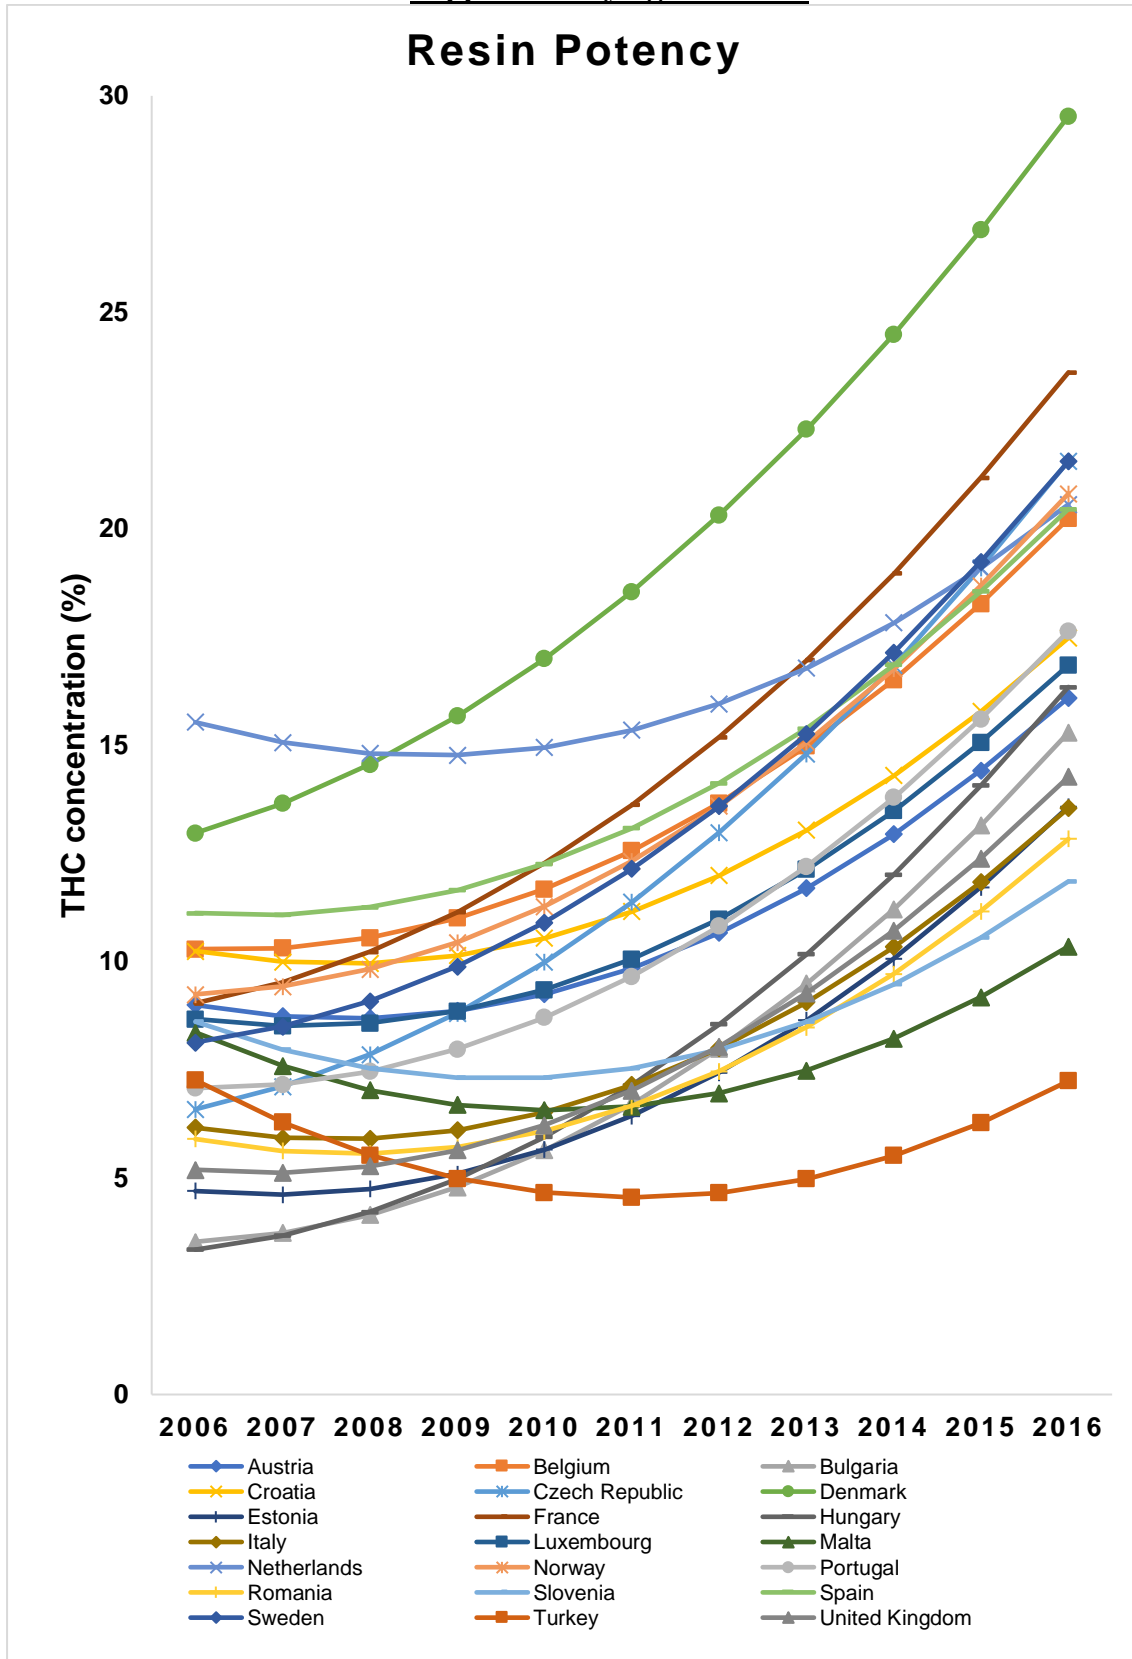

Figure S1. Changes in resin potency in Europe by year, 2006-2016. Data show parameter estimates for the random intercept and slope of Country. THC concentrations in resin (%) showed a quadratic trend over time. This model accounts for variation across countries at baseline (random intercept) and the magnitude of change from 2006-2016 (random slope)

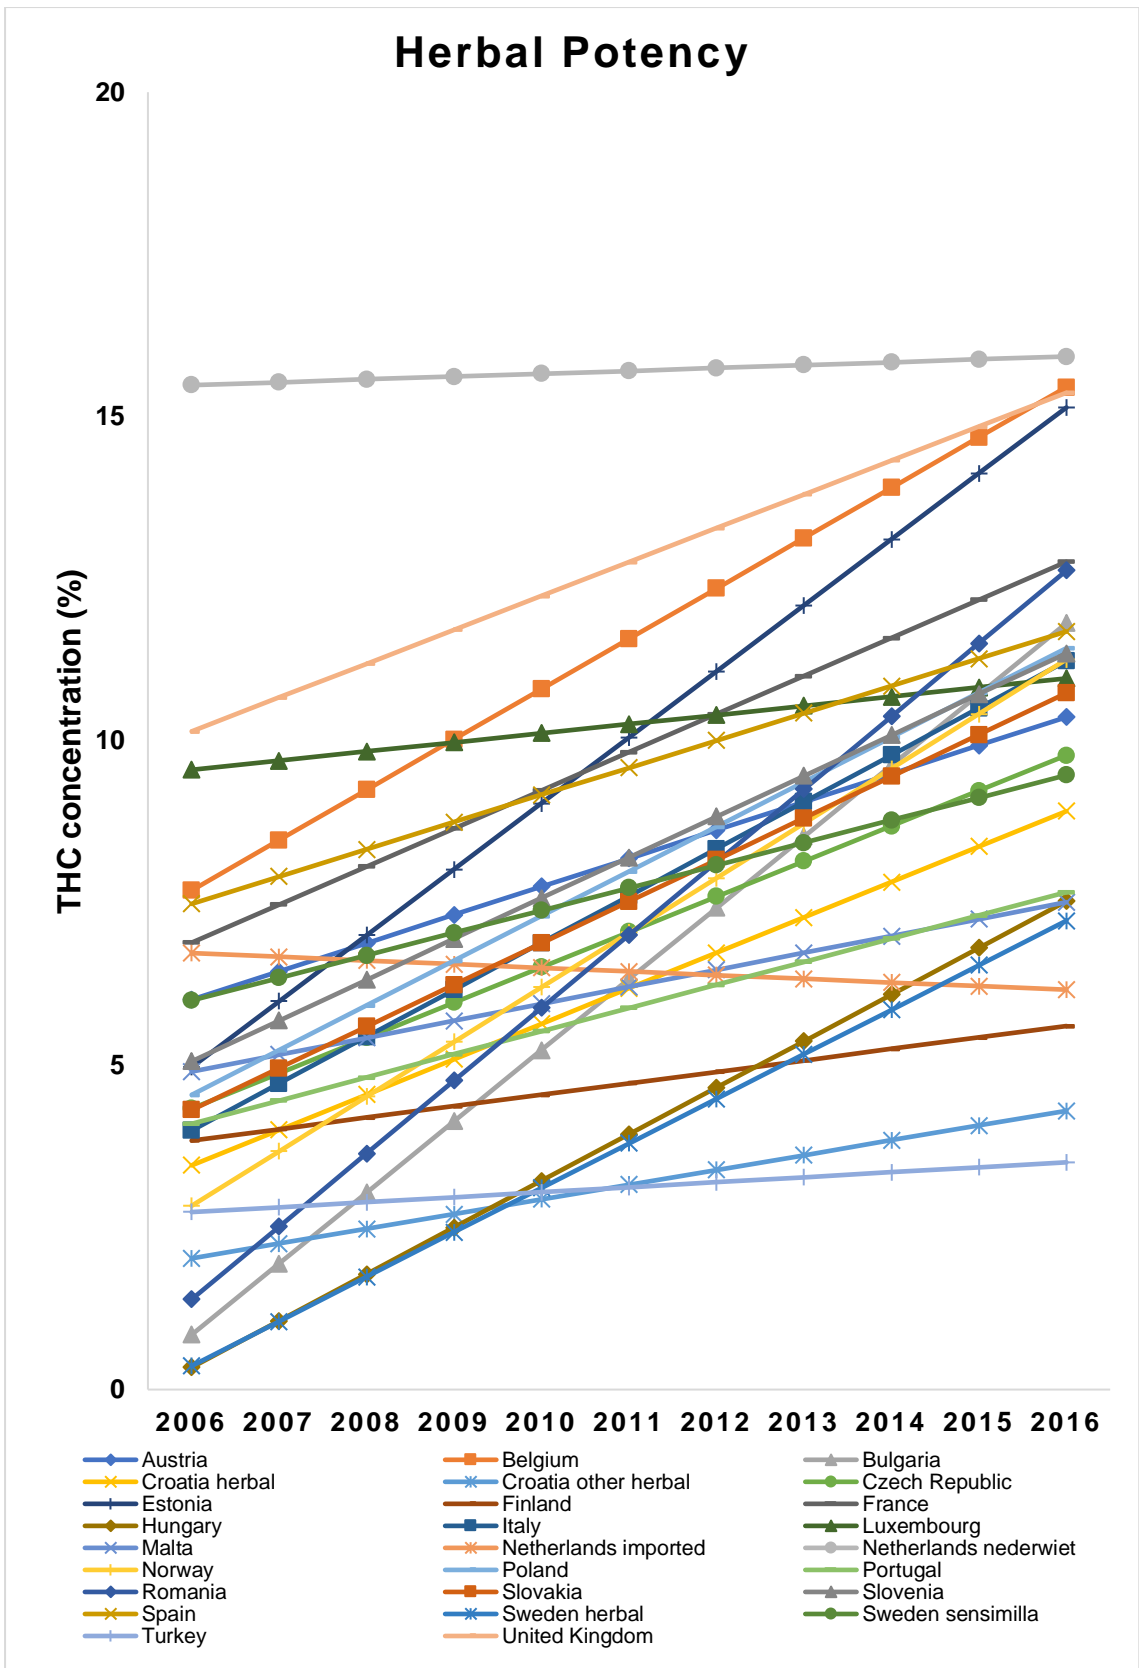

Figure S2. Changes in herbal potency in Europe by year, 2006-2016. Data show parameter estimates for the random intercept and slope of Country. THC concentrations in herbal cannabis (%) showed a linear trend over time. This model accounts for variation across countries at baseline (random intercept) and the magnitude of change from 2006-2016 (random slope)

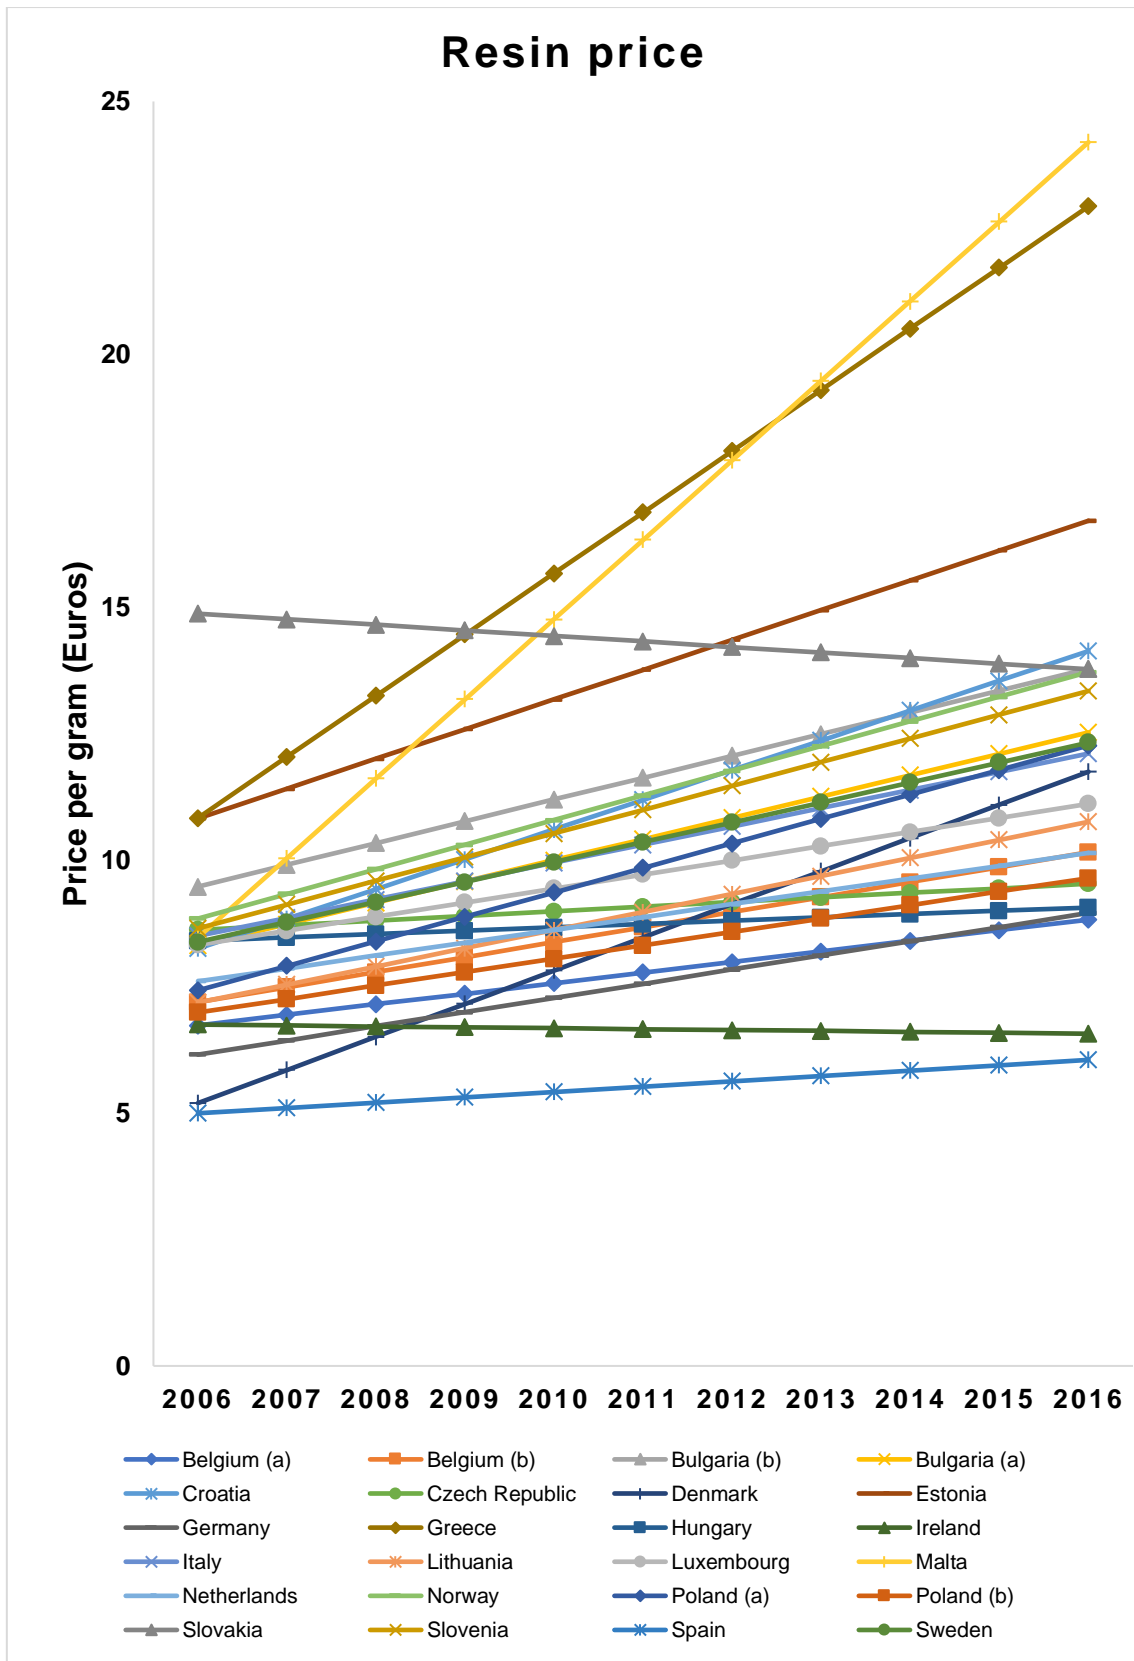

Figure S3. Changes in resin price in Europe by year, 2006-2016. Data show parameter estimates for the random intercept and slope of Country. The data shown are not adjusted for inflation. The price of cannabis resin (Euros) showed a linear trend over time. This model accounts for variation across countries at baseline (random intercept) and the magnitude of change from 2006-2016 (random slope)

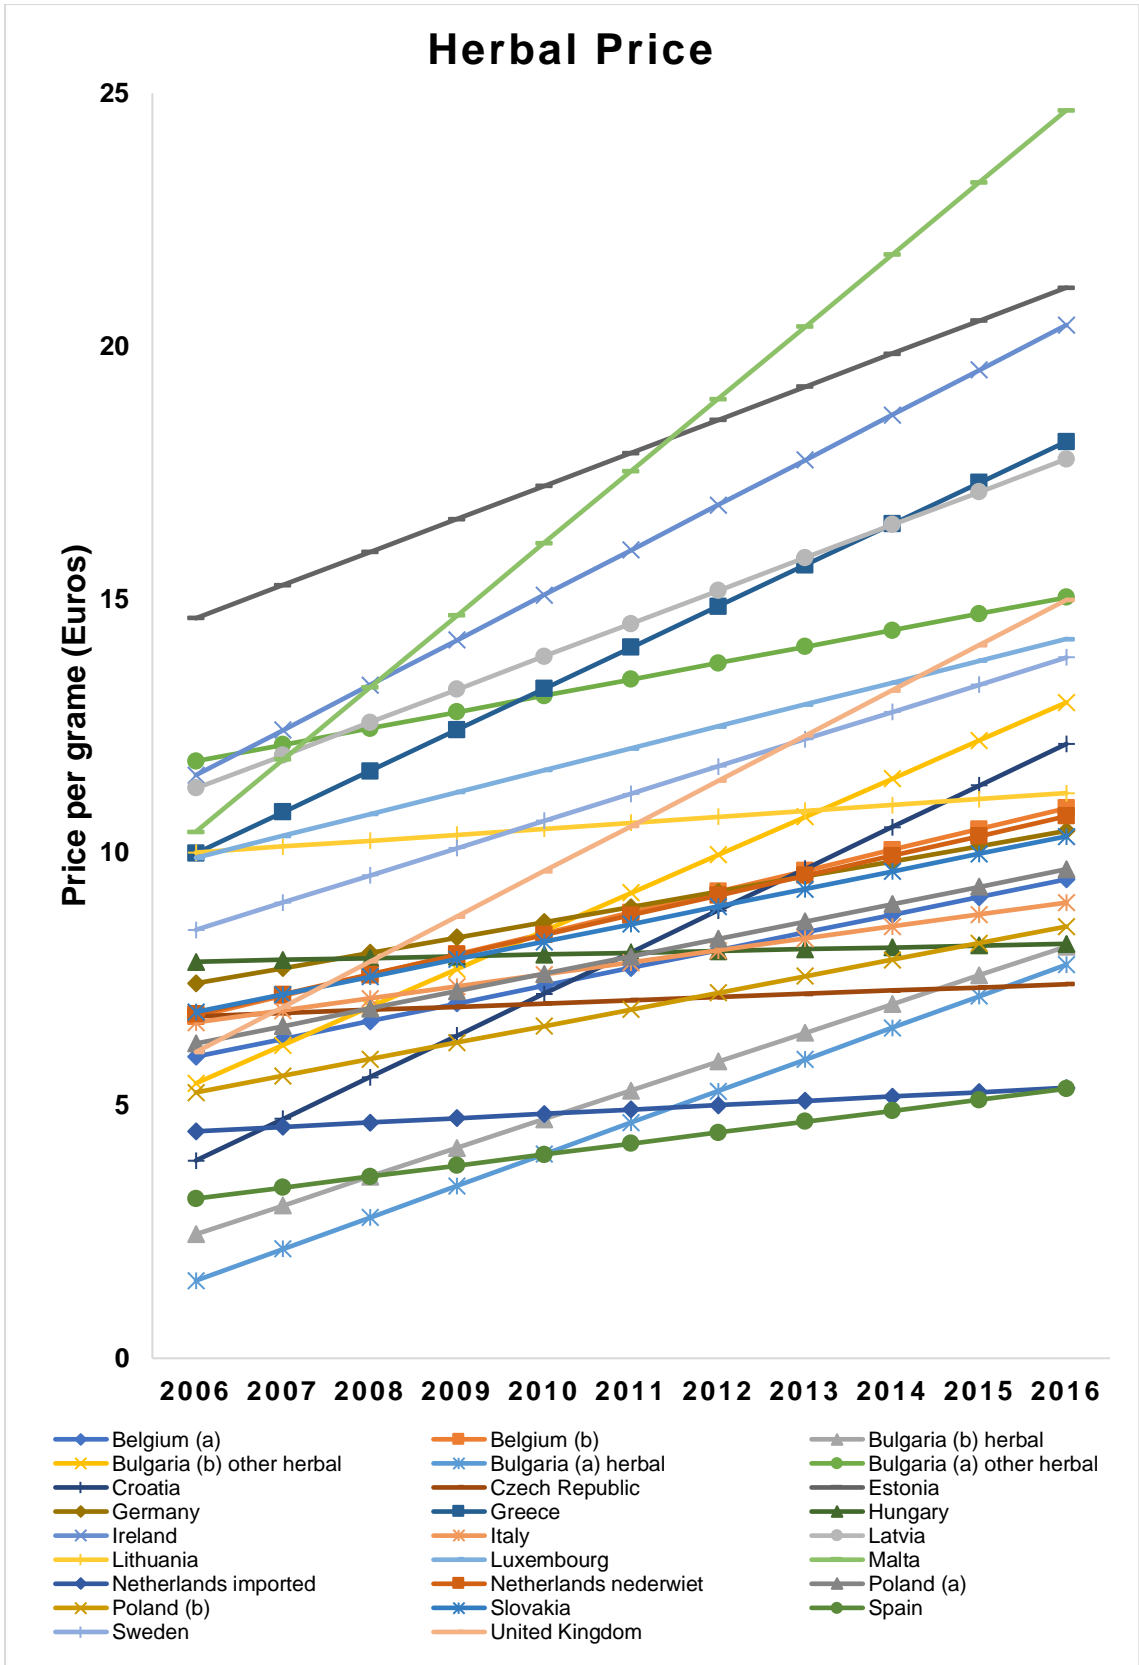

Figure S4. Changes in herbal price in Europe by year, 2006-2016. Data show parameter estimates for the random intercept and slope of Country. The data shown are not adjusted for inflation. The price of herbal cannabis (Euros) showed a linear trend over time. This model accounts for variation across countries at baseline (random intercept) and the magnitude of change from 2006-2016 (random slope)

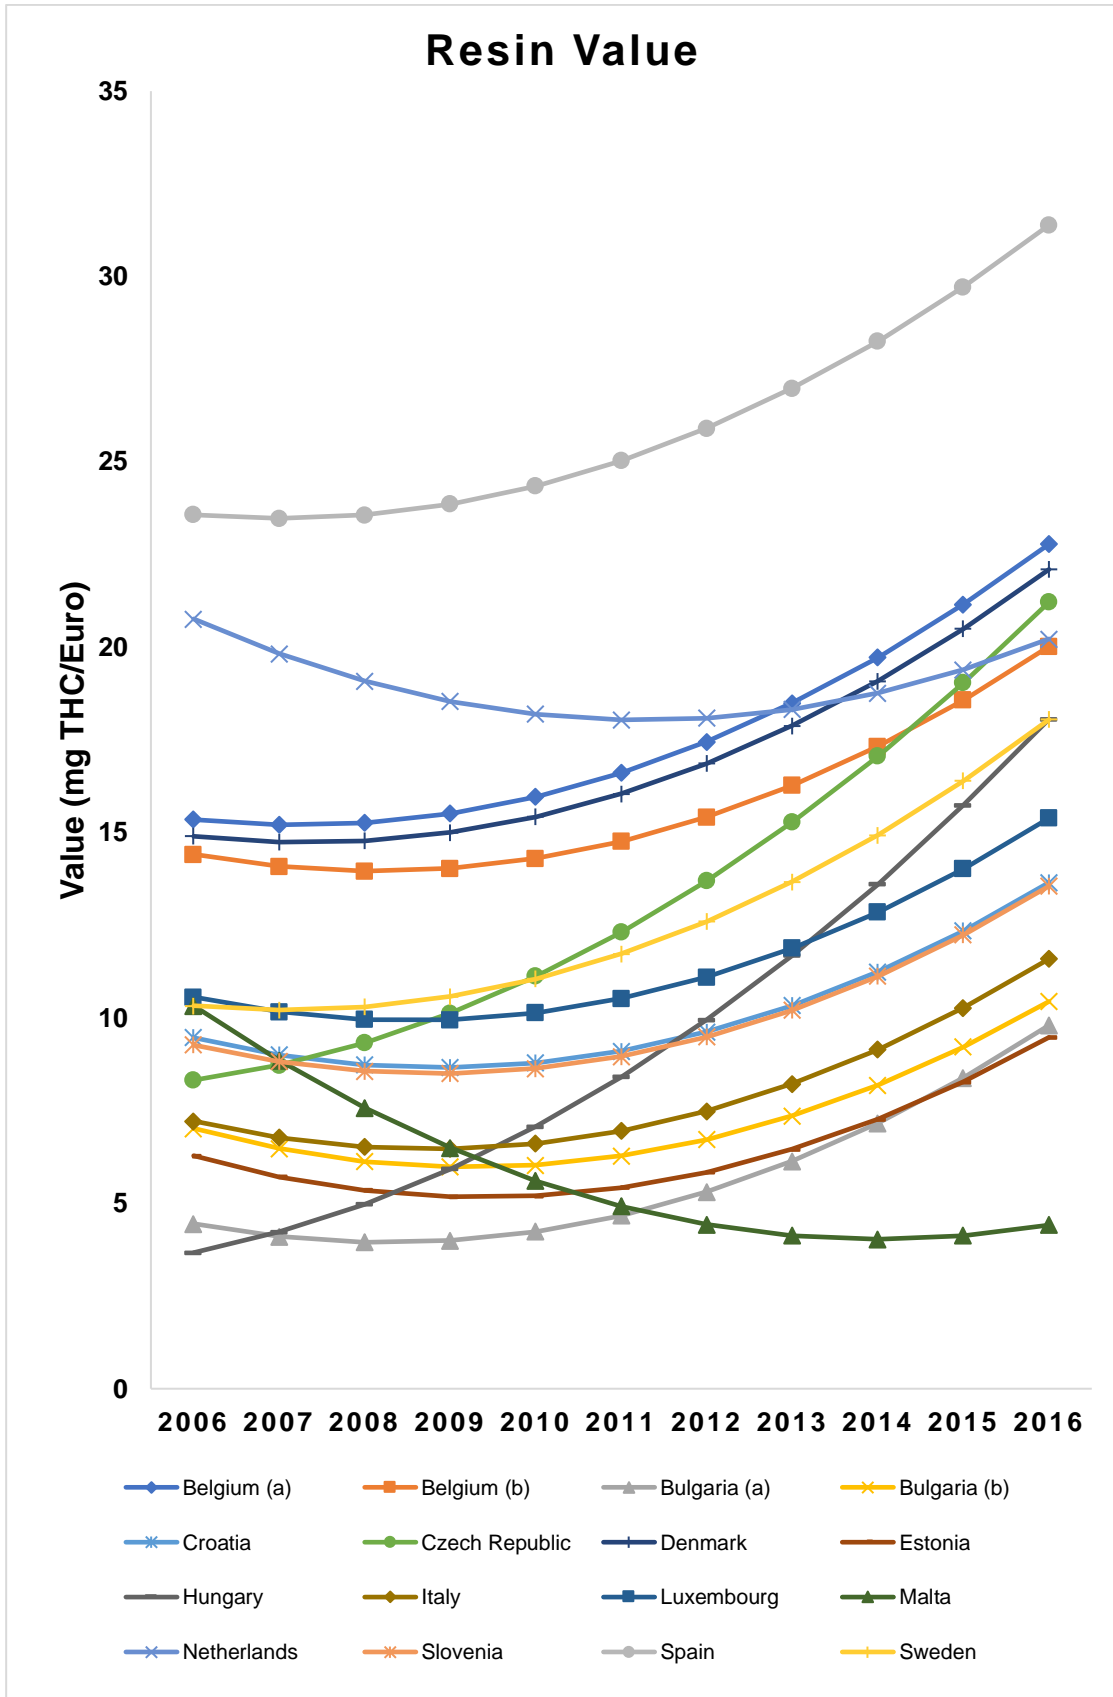

Figure S5. Changes in value of cannabis resin in Europe by year, 2006-2016. Data show parameter estimates for the random intercept and slope of Country. The data shown are not adjusted for inflation. The price of cannabis resin (Euros) showed a quadratic trend over time. This model accounts for variation across countries at baseline (random intercept) and the magnitude of change from 2006-2016 (random slope)

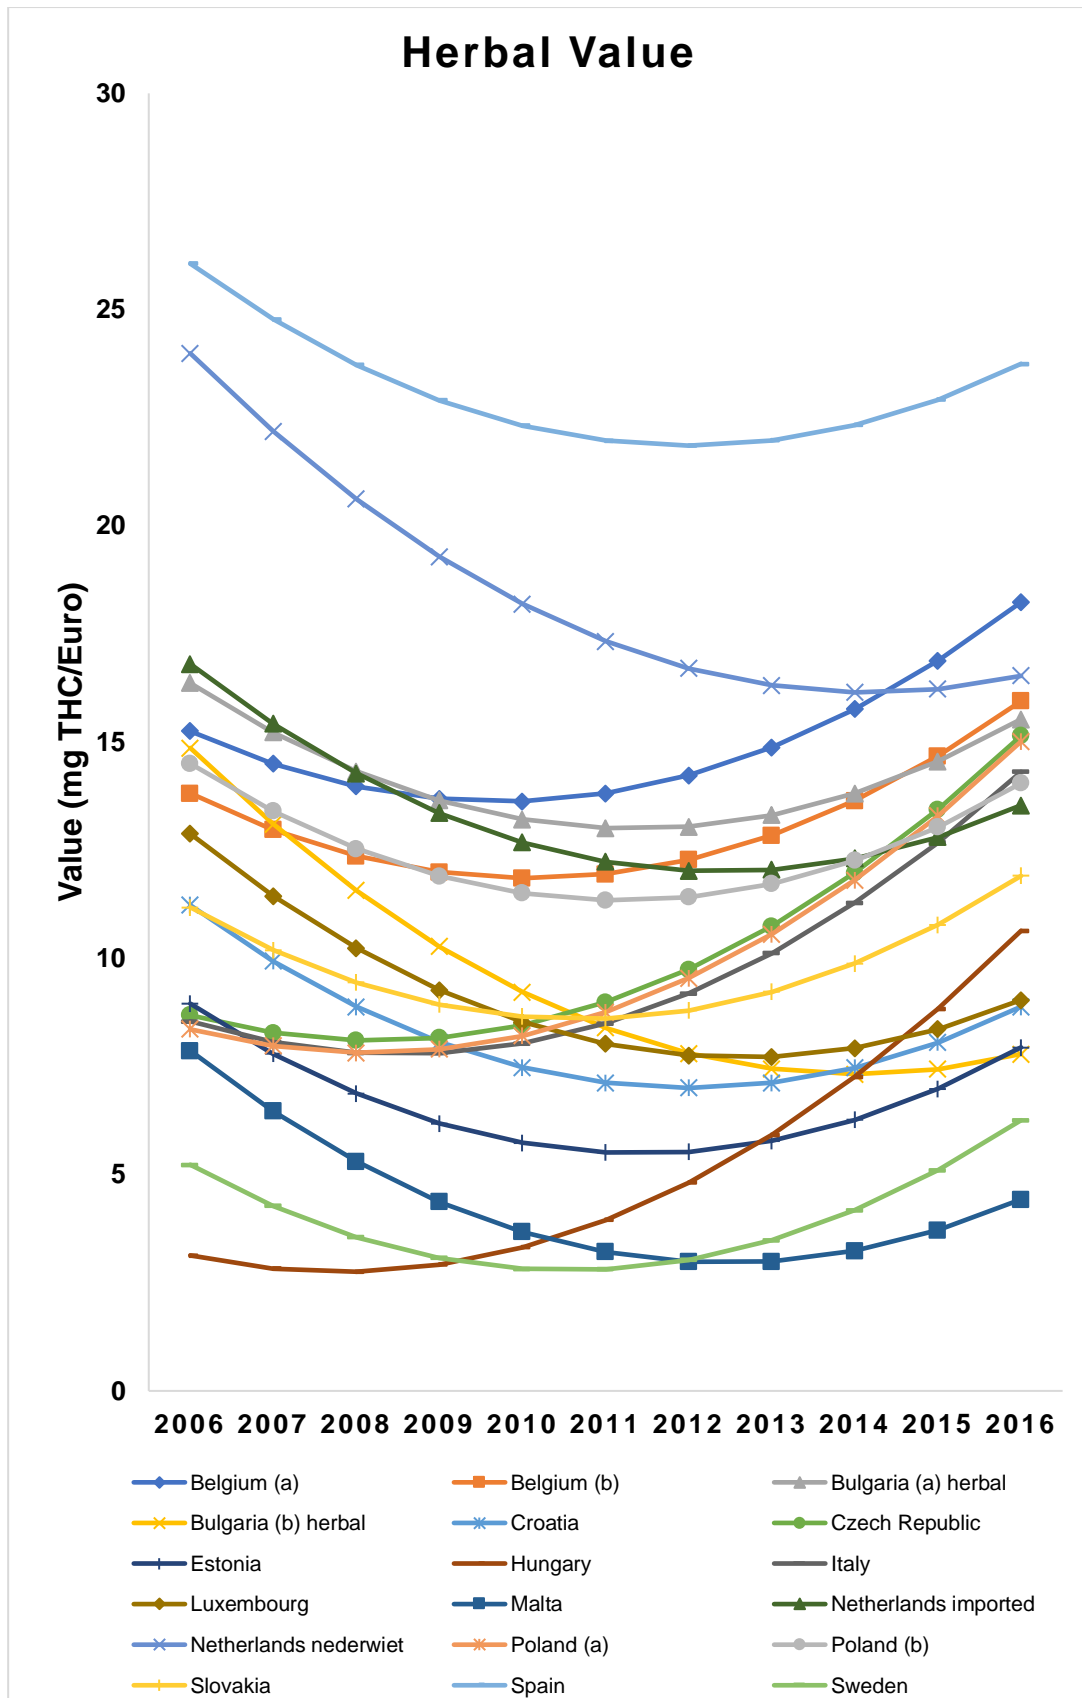

Figure S6. Changes in value of herbal cannabis price in Europe by year, 2006-2016. Data show parameter estimates for the random intercept and slope of Country. The data shown are not adjusted for inflation. The price of herbal cannabis (Euros) showed a linear and quadratic trend over time. This model accounts for variation across countries at baseline (random intercept) and the magnitude of change from 2006-2016 (random slope)

## Supporting information on model fit statistics

### (i) *Changes in potency*

Resin potency data from 2006-2016 are shown in Figure 1(A) and Table 2. Firstly, Year was fitted as a fixed effect to model a linear trend of annual changes in resin potency. In this model there was evidence for a linear increase in potency over time ( $z=8.98, p<0.001$ ). Next, a quadratic trend of Year was added as a fixed effect. This improved model fit, as evidenced by a decrease in BIC ( $\Delta\text{BIC}=9.34$ ) and a significant likelihood ratio test ( $\chi^2_{(1)}=14.56, p<0.001$ ). In this model there was evidence for a quadratic trend ( $z=3.89, p<0.001$ ) but not a linear trend ( $z= -1.20, p=0.231$ ). Next, a random intercept and slope of Country was added to account for variation in potency and its association with time across countries (Figure S1). This improved model fit, as evidenced by a decrease in BIC ( $\Delta\text{BIC}=103.54$ ) and a significant likelihood ratio test ( $\chi^2_{(2)}=113.99, p<0.001$ ). In this final model, there was evidence for a quadratic trend of Year ( $\beta=0.11, 95\% \text{ CI: } 0.06, 0.16, z=4.01, p<0.001$ ) but not a linear trend of Year ( $\beta= -0.17, 95\% \text{ CI: } -0.69, 0.34, z= -0.66, p=0.510$ ).

Herbal cannabis potency data from 2006-2016 are shown in Figure 1(B) and Table 2. Firstly, a linear trend of Year was fitted as a fixed effect. In this model there was evidence for an increase in potency over time ( $z=6.13, p<0.001$ ). Next, a quadratic trend of Year was added as a fixed effect. However, this did not improve model fit, as evidenced by an increase in BIC ( $\Delta\text{BIC}=4.45$ ) and a non-significant likelihood ratio test ( $\chi^2_{(1)}=1.00, p=0.316$ ). Therefore, the quadratic trend was removed from the model. Next, a random intercept and slope of Country was added (Figure S2), which improved model fit ( $\Delta\text{BIC}=209.30, \text{ likelihood ratio } \chi^2_{(2)}=220.22, p<0.001$ ). In this final model (including Year and Country), there was evidence for a linear trend of year ( $\beta=0.52, 95\% \text{ CI: } 0.43, 0.61, z=11.51, p<0.001$ ).



(ii) *Changes in price*

Resin price data from 2006-2016 are shown in Figure 1(C) and Table 3. Firstly, a linear trend of Year was fitted as a fixed effect. In this model there was evidence for an increase in price over time ( $z=5.22, p<0.001$ ). Next, a quadratic trend of Year was added as a fixed effect. However, this did not improve model fit, as evidenced by an increase in BIC ( $\Delta\text{BIC}=4.58$ ) and a non-significant likelihood ratio test ( $\chi^2_{(1)}=0.60, p=0.440$ ). Therefore, the quadratic trend was removed from the model. Next, a random intercept and slope of Country was added (Figure S3), which improved model fit ( $\Delta\text{BIC}=98.37$ , likelihood ratio  $\chi^2_{(2)}=108.74, p<0.001$ ). In this final model (including Year and Country), there was evidence for a linear trend of Year ( $\beta=0.41$ , 95% CI: 0.23, 0.58,  $z=4.55, p<0.001$ ).

Changes in resin price after adjusting for inflation: Firstly a linear trend of Year was fitted as a fixed effect predicting inflation-adjusted resin price. In this model there was evidence for an increase in price over time ( $z=3.17, p<0.001$ ). Next, a quadratic trend of Year was added as a fixed effect. However, this did not improve model fit, as evidenced by an increase in BIC ( $\Delta\text{BIC}=5.02$ ) and a non-significant likelihood ratio test ( $\chi^2_{(1)}=0.16, p=0.689$ ). Therefore, the quadratic trend was removed from the model. Next, a random intercept and slope of Country was added which improved model fit ( $\Delta\text{BIC}=98.89$ , likelihood ratio  $\chi^2_{(2)}=109.25, p<0.001$ ). In this final model (including Year and Country), there was evidence for a linear trend of Year ( $\beta=0.23$ , 95% CI: 0.06, 0.40,  $z=2.59, p=0.010$ ).

Herbal cannabis price data from 2006-2016 are shown in Figure 1(D) and Table 3. Firstly, a linear trend of Year was fitted as a fixed effect. In this model there was evidence for an

increase in price over time ( $z=6.16, p<0.001$ ). Next, a quadratic trend of Year was added as a fixed effect. However, this did not improve model fit, as evidenced by an increase in BIC ( $\Delta\text{BIC}=2.99$ ) and a non-significant likelihood ratio test ( $\chi^2_{(1)}=2.42, p=0.120$ ). Therefore, the quadratic trend was removed from the model. Next, a random intercept and slope of Country was added (Figure S4), which improved model fit ( $\Delta\text{BIC}=208.50$ , likelihood ratio  $\chi^2_{(2)}=219.24, p<0.001$ ). In this final model (including Year and Country), there was evidence for a linear trend of Year ( $\beta=0.49$ , 95% CI: 0.35, 0.62,  $z=6.99, p<0.001$ ).

Changes in herbal cannabis price after adjusting for inflation: Firstly, a linear trend of Year was fitted as a fixed effect predicting inflation-adjusted resin price. In this model there was evidence for an increase in price over time ( $z=4.40, p<0.001$ ). Next, a quadratic trend of Year was added as a fixed effect. However, this did not improve model fit, as evidenced by an increase in BIC ( $\Delta\text{BIC}=3.89$ ) and a non-significant likelihood ratio test ( $\chi^2_{(1)}=1.54, p=0.214$ ). Therefore, the quadratic trend was removed from the model. Next, a random intercept and slope of Country was added. This improved model fit ( $\Delta\text{BIC}=212.58$ , likelihood ratio  $\chi^2_{(2)}=223.32, p<0.001$ ). In this final model (including Year and Country), there was evidence for a linear trend of Year ( $\beta=0.32$ , 95% CI: 0.18, 0.46,  $z=4.60, p<0.001$ ).

### **(iii) Changes in value**

Changes in value for cannabis resin (quantity of THC per price unit; mg THC/Euro) are shown in Figure 1(E) and Table 4. Firstly, a linear trend of Year was fitted as a fixed effect. In this model there was evidence for an increase in value over time ( $z=2.17, p=0.030$ ). Next, a quadratic trend of Year was added as a fixed effect. This produced provided weak evidence for an improvement in model fit, as evidenced by a decrease in BIC of  $<2$  ( $\Delta\text{BIC}=1.06$ ). However, the likelihood ratio test was significant ( $\chi^2_{(1)}=5.85, p=0.016$ ) and therefore the

quadratic trend was retained in the model. In this model, there was evidence for a quadratic trend of Year ( $z=2.45, p=0.014$ ) but not a linear trend of Year ( $z= -1.75, p=0.080$ ). Next, a random intercept and slope of Country was added (Figure S5), which improved model fit ( $\Delta\text{BIC}=99.03$ , likelihood ratio  $\chi^2_{(2)}=108.61, p<0.001$ ). In this final model, there was evidence for a quadratic trend of Year ( $\beta=0.10$ , 95% CI: 0.03, 0.17,  $z=2.68, p=0.007$ ) but not a linear trend of Year ( $\beta= -0.44$ , 95% CI: -1.23, 0.34,  $z= -1.10, p=0.270$ ).

For changes in value of cannabis resin after adjusting for inflation, a linear trend of Year was fitted as a fixed effect. In this model there was evidence for an increase in value over time ( $z=3.11, p=0.002$ ). Next, a quadratic trend of Year was added as a fixed effect. This provided weak evidence for an improvement in model fit, as evidenced by a decrease in BIC of  $<2$  ( $\Delta\text{BIC}=0.06$ ). However, the likelihood ratio test was significant ( $\chi^2_{(1)}=4.85, p=0.028$ ) and therefore the quadratic trend was retained in the model. In this model, there was evidence for a quadratic trend of Year ( $z=2.22, p=0.026$ ) but not a linear trend of Year ( $z= -1.27, p=0.203$ ). Next, a random intercept and slope of Country was added, which improved model fit as evidenced by a reduction in BIC ( $\Delta\text{BIC}=98.58$ ) and a significant likelihood ratio test ( $\chi^2_{(2)}=108.15, p<0.001$ ). In this final model, there was evidence for a quadratic trend of Year ( $\beta=0.08$ , 95% CI: 0.01, 0.15,  $z=2.25, p=0.025$ ) but not a linear trend of Year ( $\beta= -0.09$ , 95% CI: -0.88, 0.70,  $z= -0.22, p=0.829$ ).

Changes in value of herbal cannabis (quantity of THC per price unit; mg THC/Euro) are shown in Figure 1(F) and Table 4. Firstly, a linear trend of Year was fitted as a fixed effect. In this model there was no evidence for a linear trend ( $z= -0.85, p=0.393$ ). Next, a quadratic trend of Year was added as a fixed effect. This produced provided weak evidence for an improvement in model fit, as evidenced by a decrease in BIC of  $<2$  ( $\Delta\text{BIC}=0.36$ ). However,

the likelihood ratio test was significant ( $\chi^2_{(1)}=5.39, p=0.020$ ) and therefore the quadratic trend was retained in the model. In this model, there was evidence for a linear trend of Year ( $z = -2.49, p=0.013$ ) and a quadratic trend of Year ( $z=2.34, p=0.019$ ). Next, a random intercept and slope of Country was added (Figure S6), which improved model fit ( $\Delta\text{BIC}=128.08$ , likelihood ratio  $\chi^2_{(2)}=138.14, p<0.001$ ). In this final model, there was evidence for a linear trend of year ( $\beta = -1.17, 95\% \text{ CI: } -1.97, -0.36, z = -2.83, p=0.005$ ) and a quadratic trend of Year ( $\beta=0.12, 95\% \text{ CI: } 0.05, 0.19, z=3.18, p<0.001$ ).

For changes in value of herbal cannabis after adjusting for inflation, a linear trend of Year was fitted as a fixed effect. In this model there was no evidence for a linear trend ( $z = 0.53, p=0.595$ ). Next, a quadratic trend of Year was added as a fixed effect. This produced provided weak evidence for a decrease in model fit, as evidenced by an increase in BIC of  $<2$  ( $\Delta\text{BIC}=1.01$ ). However, the likelihood ratio test was significant ( $\chi^2_{(1)}=4.02, p=0.045$ ) and therefore the quadratic trend was retained in the model. In this model, there was evidence for a quadratic trend of Year ( $z=2.02, p=0.044$ ) but not a linear trend of Year ( $z = -1.80, p=0.072$ ). Next, a random intercept and slope of Country was added, which improved model fit ( $\Delta\text{BIC}=127.76$ , likelihood ratio  $\chi^2_{(2)}=137.82, p<0.001$ ). In this final model, there was evidence for a quadratic trend of Year ( $\beta=0.10, 95\% \text{ CI: } 0.03, 0.17, z=2.66, p=0.008$ ) but not a linear trend of Year ( $\beta = -0.75, 95\% \text{ CI: } -1.57, 0.06, z = -1.81, p=0.070$ ).
